# Supplementary material
Source: Springer Nature journal article supplement (https://www.springermedizin.de/resource/supplementary/12885_2008_1191_MOESM5_ESM.pdf/9471360)
Supplement: MOESM5 [file 9471360]

| Competitor            | -  | -   | <u>Unmethyl</u> |      | <u>Methyl</u> |      | -  | -   | <u>Unmethyl</u> |      | <u>Methyl</u> |    |
|-----------------------|----|-----|-----------------|------|---------------|------|----|-----|-----------------|------|---------------|----|
|                       |    |     | 50x             | 100x | 50x           | 100x |    |     | 50x             | 100x |               |    |
| <sup>32</sup> P-probe | Wt | Met | Wt              | Wt   | Wt            | Wt   | Wt | Met | Wt              | Wt   | Wt            | Wt |
| Nucleic Protein       | +  | +   | +               | +    | +             | +    | +  | +   | +               | +    | +             | +  |

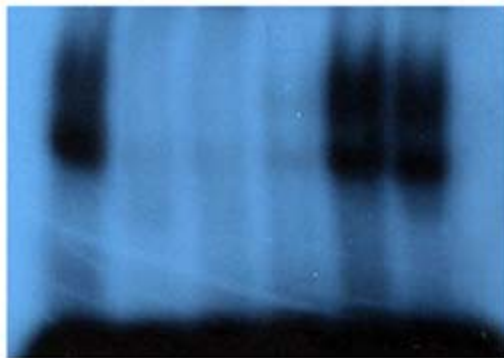

Sp1 (-353/-337)

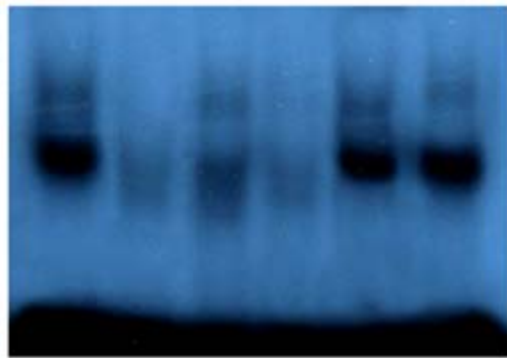

Sp1 (-330/-317)
